# Supplementary material
Source: ML conference proceedings conference paper supplement (https://proceedings.mlr.press/v70/zhou17b.html)
Supplement: Supplementary file 1 [file zhou17b-supp.pdf]

## A. Proof of Lemma 2

The proof of Lemma 2 relies on the following lemma:

**Lemma 7.** For positive measurable functions  $f_i$ , we have:

$$\left( \int \prod_{i=1}^K f_i(x) dx \right)^K \leq \prod_{i=1}^K \int f_i^K(x) dx. \quad (4)$$

*Proof.* By Cauchy-Schwarz inequality, Eq. (4) is correct for  $K = 2$ . We use mathematical induction to prove that it still holds for  $K > 2$ . Specifically, assume InEq. (4) is true for  $K - 1$ , considering case  $K$ , by Holder's inequality we have:

$$\begin{aligned} \left( \int \prod_{i=1}^K f_i(x) dx \right)^K &= \left( \int f_K(x) \prod_{i=1}^{K-1} f_i(x) dx \right)^K \\ &\leq \left( \left( \int f_K^K(x) dx \right)^{\frac{1}{K}} \left( \int \left( \prod_{i=1}^{K-1} f_i(x) \right)^{\frac{K}{K-1}} dx \right)^{\frac{K-1}{K}} \right)^K \\ &= \left( \int f_K^K(x) dx \right) \left( \int \left( \prod_{i=1}^{K-1} f_i(x) \right)^{\frac{K}{K-1}} dx \right)^{K-1} \\ &\leq \prod_{i=1}^K \int f_i^K(x) dx. \end{aligned}$$

□

Now we present the proof of Lemma 2.

*Proof.* With straight-forward computations, we have:

$$\sum_{k=1}^K P_k(\psi = k) = \sum_{k=1}^K \int_{\psi=k} dP_k = \sum_{k=1}^K \int_{\psi=k} \frac{dP_k}{dP_1} dP_1.$$

Because we need a bound for any measurable function  $\psi$ , we need to construct the  $\psi$  that minimizes the last expression. Obviously, the last expression is minimized for  $\psi(x) = \arg \min_{k \leq K} \frac{dP_k}{dP_1}(x)$ , so that

$$\sum_{k=1}^K P_k(\psi = k) \geq \int dP_1 \min_k \frac{dP_k}{dP_1} = \int \min_k dP_k.$$

For vector  $\bar{P} = \{dP_1, \dots, dP_K\}$ , define  $r_i(\bar{P})$  be the  $i$ -th smallest value in  $\bar{P}$ , we have

$$\left( \int \left( \prod_k dP_k \right)^{\frac{1}{K}} \right)^K = \left( \int \left( \prod_k r_k(\bar{P}) \right)^{\frac{1}{K}} \right)^K \leq \prod_k \int r_k(\bar{P}) = \int \min_k dP_k \prod_{k \geq 2} \int r_k(\bar{P}).$$

The above inequality is proven by Lemma 7. Note that  $\sum_k \int dP_k \leq K$ , so  $\prod_{k \geq 2} \int r_k(\bar{P}) \leq \left( \frac{K}{K-1} \right)^{K-1} < e$ . With Jensen's inequality, it yields that:

$$\begin{aligned} \sum_{k=1}^K P_k(\psi = k) &\geq \frac{1}{e} \left( \int \left( \prod_k dP_k \right)^{\frac{1}{K}} \right)^K \\ &= \frac{1}{e} \exp \left\{ K \log \int \left( \prod_k dP_k \right)^{\frac{1}{K}} \right\} \\ &= \frac{1}{e} \exp \left\{ K \log \int \left( \prod_k \frac{dP_k}{dP_1} \right)^{\frac{1}{K}} dP_1 \right\} \\ &\geq \frac{1}{e} \exp \left\{ \sum_k \int dP_1 \log \frac{dP_k}{dP_1} \right\} \\ &= \frac{1}{e} \exp \left\{ - \sum_{k=2}^K KL(P_1, P_k) \right\}. \end{aligned}$$

### B. Proof of Lemma 3

*Proof.* With Hoeffding's inequality and InEq. (2) in the main text, we have

$$\begin{aligned}
 P\left(i : \frac{1}{u'_i} \sum_{i=1}^{u'_i} Y_i^s - \mu_s > \beta(u_i, t_i)\right) &\leq \sum_{i \geq 1} P\left(\frac{1}{u'_i} \sum_{i=1}^{u'_i} Y_i^s - \mu_s > \beta(u_i, t_i)\right) \\
 &\leq \sum_{i \geq 1} \exp\{-2u'_i \beta(u_i, t_i)^2\} \\
 &\leq \sum_{i \geq 1} \exp\{-2u_i \beta(u_i, t_i)^2\} \\
 &\leq \frac{\delta}{2K}.
 \end{aligned}$$

Then, applying the union bound, we complete the proof. □

### C. Proof of Lemma 4

In this section, we are going to show that  $\mathbb{E}[\gamma - T(t_\gamma)] \leq O(H_c(j) \log \gamma)$  to complete the proof of Lemma 4. The proof is the same as that of Theorem 1 in (Auer et al., 2002), except some constants.

*Proof.* For simplicity, let  $s_1$  denote  $s_c^*(j)$ . Considering  $s : \mu_s < \mu_{s_1}$ , let  $ev(s, \gamma)$  be the event that  $s$  is pulled at line 22 by Alg. 1 at round  $\gamma$ . Let  $T_s(t_\gamma)$  denote the number of pulls on arm  $s$  in line 22 Alg. 1 when Alg. 1 selects column  $j$  for the  $\gamma$ -th time. Then,  $\mathbb{E}[T_s(t_\gamma)]$  can be bounded as follows:

$$\begin{aligned}
 \mathbb{E}[T_s(t_\gamma)] &= \sum_{\gamma'=1}^{\gamma} \mathbb{1}[\text{The algorithm pulls arm } s \text{ in line 22 when Alg. 1 selects column } j \text{ for the } \gamma\text{-th round}] \\
 &\leq l + \sum_{\gamma'=1}^{\gamma} \mathbb{1}[T_s(t'_\gamma - 1) \geq l, ev(s, \gamma')] \\
 &\leq l + \sum_{\gamma'=1}^{\gamma} \mathbb{1}\left[T_s(t'_\gamma - 1) \geq l, \bar{\mu}_{s_1} + \sqrt{2 \frac{\log t}{T_{s_1}(t'_\gamma - 1)}} \leq \bar{\mu}_s + \sqrt{2 \frac{\log \gamma'}{T_s(t'_\gamma - 1)}}\right] \\
 &\leq l + \sum_{\gamma'=1}^{\gamma} \mathbb{1}\left[T_s(t'_\gamma - 1) \geq l, \min_{\gamma_1 \in [1, \gamma' - 1]} \bar{\mu}_{s_1} + \sqrt{2 \frac{\log \gamma}{\gamma_1}} \leq \max_{\gamma_2 \in [l, \gamma - 1]} \bar{\mu}_s + \sqrt{2 \frac{\log \gamma}{\gamma_2}}\right] \\
 &\leq l + \sum_{\gamma'=1}^{\gamma} \sum_{\gamma_1=0}^{\gamma-1} \sum_{\gamma_2=l}^{\gamma-1} \mathbb{1}\left[\bar{\mu}_{s_1} + \sqrt{2 \frac{\log \gamma'}{\gamma_1}} \leq \bar{\mu}_s + \sqrt{2 \frac{\log \gamma'}{\gamma_2}}\right].
 \end{aligned}$$

Since  $\bar{\mu}_{s_1} + \sqrt{2 \frac{\log \gamma'}{\gamma_1}} \leq \bar{\mu}_s + \sqrt{2 \frac{\log \gamma'}{\gamma_2}}$ , at least one of the following three events happens:

- $\bar{\mu}_{s_1} \leq \mu_{s_1} - \sqrt{2 \frac{\log \gamma'}{\gamma_1}}$ ;
- $\bar{\mu}_s \leq \mu_s - \sqrt{2 \frac{\log \gamma'}{\gamma_2}}$ ;
- $\mu_{s_1} \leq \mu_s + 2\sqrt{2 \frac{\log \gamma'}{\gamma_2}}$ .

By Hoeffding's inequality, the probability that the first and the second events happen is at most  $2\gamma'^{-4}$ , and for  $l \geq \frac{8}{(\mu_s - \mu_{s_1})^2} \log \gamma$ , the third event will not happen. So we have  $\mathbb{E}[T_s(t_\gamma)] = O\left(\frac{1}{(\mu_s - \mu_{s_1})^2} \log \gamma\right)$ . Then, with straightforward computations we complete the proof. □

## D. Proof of Lemma 5

*Proof.* Suppose  $s^* \neq \text{none}$ . If at round  $\gamma$ , Alg.1 does not select  $R_{s^*[1]}$  or  $C_{s^*[2]}$ , then at least one of following events happens:

- $\exists s \notin \{\text{none}, s^*\}, s = NE(\bar{\mathbf{M}}_t)$ ;
- $NE(\bar{\mathbf{M}}_t) = \text{none}$ .

For the first part, it is easy to see that  $s \neq s_r^*(s[1])$  or  $s \neq s_c^*(s[2])$ . So by Lemma 4, the size of this part is at most  $2(\sum_i \Lambda(H_r(i)) + \sum_j \lambda(H_c(j)))$ .

Similarly, if the second case happens, then  $s^* \neq \arg \min_{s' \in \text{row}(s^*)} \bar{\mu}_{s'}$  or  $s^* \neq \arg \max_{s' \in \text{col}(s^*)} \bar{\mu}_{s'}$ . When the second case happens for the  $\gamma$ -th round, due to Alg.1, we selected  $R_{s^*[1]}$  for at least  $\lfloor \gamma/m \rfloor$  times and  $C_{s^*[2]}$  for at least  $\lfloor \gamma/n \rfloor$  times. So by Lemma 4, the size of the second part is at most  $\lceil (m+n)(\Lambda(H_r(s^*[1])) + \Lambda(H_c(s^*[2]))) \rceil$ .  $\square$

## E. Proof of Lemma 6

This proof is the same as the proof of Theorem 6 in Kalyanakrishnan et al. (2012), except the statement and some constants.

*Proof.* Without loss of generality, consider a bandit model  $v = \{s_1, \dots, s_k\}$ . Suppose  $\mu_{s_i} > \mu_{s_{i+1}}$ . At each round, we pull arms in  $v$  as from line 21 to line 23 in Alg. 1. Let  $H = \sum_{i=2}^k \frac{1}{(\mu_{s_1} - \mu_{s_i})^2}$ . Let  $s_1(\gamma) = \arg \max_{s \in v} \bar{\mu}_s$  after round  $\gamma$ , and  $s_2(\gamma) = \arg \max_{s \in v \setminus s_1(\gamma)} U(s, |T_s(\tau)|, |\tau|)$ . Denote  $\tau(\gamma)$  be the set of time steps  $t$  in the first  $\gamma$  round. If after  $\gamma_v$  round, we have  $L(s_1(\gamma), |T_{s_1(\gamma)}(\tau)|, |\tau|) > U(s_2(\gamma), |T_{s_2(\gamma)}(\tau)|, |\tau|)$ , we now show that  $\mathbb{E}\gamma_v = O(H_v \log \frac{H_v}{\delta})$ .

Now let us introduce some notations. Define  $c = \frac{\mu_{s_1} + \mu_{s_2}}{2}$  and

$$\Delta_i := \begin{cases} \mu_{s_1} - \mu_{s_2} & i = 1, \\ \mu_{s_1} - \mu_{s_i} & i \geq 2 \end{cases}$$

During round  $\gamma$ , we partition the set of arms into three subsets:

- $Above^\gamma := \{s \in v : \bar{\mu}_s - \beta(T_s(\gamma), \gamma) > c\}$ .
- $Below^\gamma := \{s \in v : \bar{\mu}_s + \beta(T_s(\gamma), \gamma) < c\}$ .
- $Middle^\gamma := v \setminus (Above^\gamma \cup Below^\gamma)$ .

And by Lemma 2 in Kalyanakrishnan et al. (2012), if we cannot identify  $\arg \max_{s \in v} \mu(s)$  after round  $\gamma$ , then  $s_1(\gamma) \in Middle^\gamma$  or  $s_2(\gamma) \in Middle^\gamma$ . And with similar computation to Lemma 4 in Kalyanakrishnan et al. (2012), if for all arm  $s_i$ , we pulled at least  $4 \lceil \frac{1}{2\Delta_i} \ln \frac{mn\gamma^4}{4\delta} \rceil$  times, then  $\forall s, s \notin Middle^\gamma$  with probability at least  $1 - \frac{3\delta H_v}{mn\gamma^4}$ . The rest is all the same as Theorem 6 in Kalyanakrishnan et al. (2012).  $\square$

## F. Proof of Theorem 5

*Proof.* With the same argument as Theorem 8 in Even-Dar et al. (2006), for  $s_1, s_2$ , suppose  $\mu_{s_1} - \mu_{s_2} = \Delta > 0$ . Then with probability at least  $1 - \delta/(mn)$ , after round  $\gamma = O(\frac{\ln(mn/\delta\Delta)}{\Delta^2})$ , we have  $\bar{\mu}_{s_1} - \bar{\mu}_{s_2} > 2\beta_1(\gamma)$ . So by the union bound, the racing algorithm stops after finite time with probability at least  $1 - \delta$ .

Then we show that Alg. 2 is  $\delta$ -PAC.

According to Lemma 3, the probability that there is an arm  $s$  such that  $|\bar{\mu}_s - \mu_s| > \beta_1(\gamma)$  for some  $\gamma$  is at most  $\delta$ . Suppose  $\forall s, \gamma, |\bar{\mu}_s - \mu_s| > \beta_1(\gamma)$ .

For the case  $NE(\mathbb{M}) = \text{none}$ , consider arm  $s$ . If  $s \notin \{s_r^*(s[1]), s_c^*(s[2])\}$ , clearly, it will be eliminated when its confidence bounds are disjoint with the confidence bounds of  $s_r^*(s[1])$  and  $s_c^*(s[2])$ . Otherwise, if  $s \in \{s_r^*(s[1]), s_c^*(s[2])\}$ , without loss of generality, suppose  $s = s_r^*(s[1])$ . Obviously, there is a sequence  $S = \{s_1, s_2, \dots, s_{2k}\}$  such that (1)  $s = s_1$ ; (2)  $s_{2i+1} = s_r^*(s_{2i+1}[1])$  and  $s_{2i} = s_c^*(s_{2i}[2])$  for all  $i$ , where  $s_j = s_{(j-1)\% (2k)+1}$ ; (3)  $s_{2i+1} \in \text{col}(s_{2i})$  and  $s_{2i+2} \in \text{row}(s_{2i+1})$ . And according to Alg.2, all the arms in  $S$  will be eliminated when their confidence bounds are disjoint.

For the case  $s^* = NE(\mathbb{M}) \neq \text{none}$ , obviously, it won't be eliminated by our elimination rule, so Algorithm is  $\delta$ -PAC.

Up to now we have proven the two statements about Alg. 2 in Theorem 5. □

## G. Correctness of baseline

Here, We present the stopping and recommendation rules of our baseline algorithm in detail.

**Stopping and recommendation rules:** In each round, we pull all arms. Let  $\beta_2(\gamma) = \sqrt{\log(5mn\gamma^2/4\delta)}/\gamma$ . After the  $t$ -th round, if one of the following event happens, the algorithm stops:

- For some arm  $s$ , if for all  $s' \in \text{row}(s) \setminus s, \exists \gamma_{s'}$ , after  $\gamma_{s'}$  rounds,  $\bar{\mu}_s + 2\beta_2(\gamma_{s'}, \delta) \leq \bar{\mu}_{s'}$  and for all  $s' \in \text{col}(s) \setminus s, \exists \gamma(s')$ , after  $\gamma_{s'}$  rounds,  $\bar{\mu}_s \geq \bar{\mu}_{s'} + 2\beta_2(\gamma_{s'}, \delta)$ , then the recommendation rule recommends  $s$  as the NE.
- For all arm  $s$ , if  $\exists s' \in \text{row}(s), \bar{\mu}_{s'} + \beta_2(t, \delta) \leq \bar{\mu}_s - \beta_2(t, \delta)$  or  $\exists s' \in \text{col}(s), \bar{\mu}_{s'} - \beta_2(t, \delta) \geq \bar{\mu}_s + \beta_2(t, \delta)$ , then the recommendation rule determines that the underlying game does not have a NE.

Obviously, this algorithm is  $\delta$ -PAC and the proof for this statement is the same as the proof for Theorem 5.
